# Supplementary material
Source: publisher figshare collection journal article supplement (https://karger.figshare.com/articles/dataset/_/5121010)
Supplement: Supplementary file 1 [file 1]

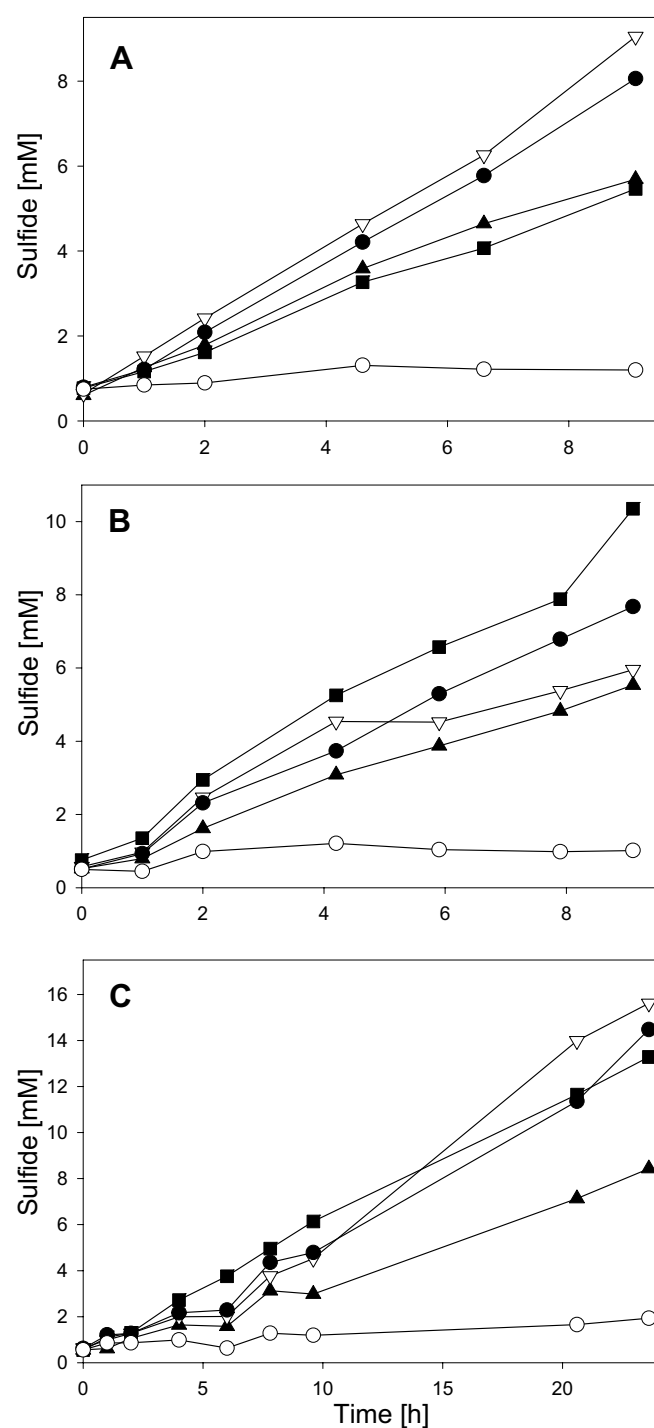

**Supplementary figure 1.** Adaptation studies with dense cell suspensions of *Db. autotrophicum* HRM2. Cells were pre-cultured with ethanol (A), 1-propanol (B) and 1-butanol (C). Dense suspensions of fresh, washed cells were supplied with (●) lactate (10 mM), (▲) ethanol (10 mM), (◻) 1-propanol (5 mM), (■) 1-butanol (5 mM) or (○) no organic substrate. Sulfide formation was determined as an indirect measure of substrate utilization. Results were confirmed by at least two independent experiments.

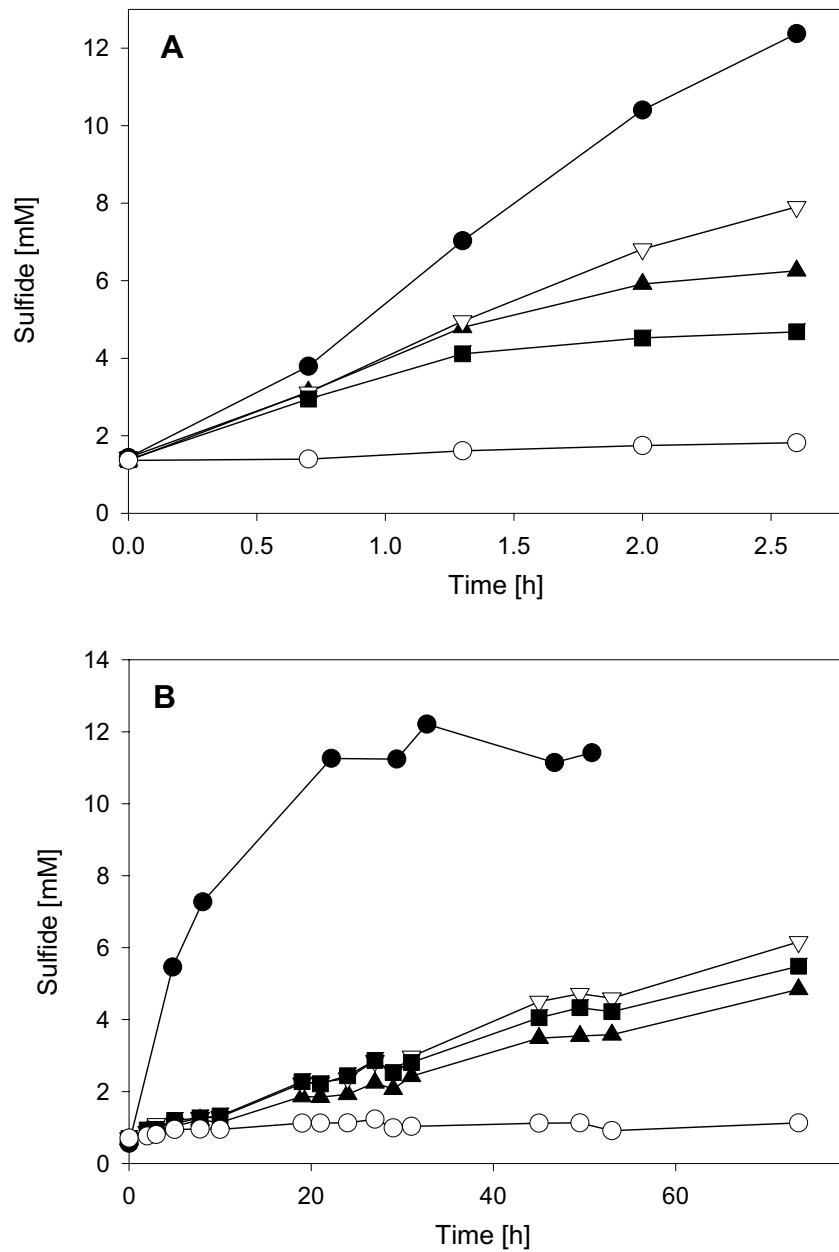

**Supplementary figure 2.** Adaptation studies with dense cell suspensions. (A) *Dv. vulgaris* Hildenborough. (B) *Dt. psychrophila* LSv54. Symbols: ●, lactate (10 mM); ▲, ethanol (10 mM); ▽, 1-propanol (5 mM); ■, 1-butanol (5 mM); ○, no substrate. Cells were adapted to growth with lactate.
