# Supplementary material
Source: publisher figshare collection journal article supplement (https://karger.figshare.com/articles/dataset/_/5121010)
Supplement: Supplementary file 2 [file 1]

**Supplementary table 1.** Identity of spots 1 and 2 (Adh4, fig. 3) based on theoretically and experimentally determined peptide masses. Protein spots were excised from cCBB-stained 2DE gels of *D. autotrophicum* HRM2 grown with ethanol, 1-propanol, 1-butanol and a mixture of lactate and 1-propanol.

| Spot <sup>a</sup> | Peptide position       | Theor. mass | Substrate |        |                 |               |           |        |                      |        |
|-------------------|------------------------|-------------|-----------|--------|-----------------|---------------|-----------|--------|----------------------|--------|
|                   |                        |             | Ethanol   |        | 1-Propanol      |               | 1-Butanol |        | Lactate + 1-Propanol |        |
|                   |                        |             | Exp.Mass  | Δ Da   | Exp.Mass        | Δ Da          | Exp.Mass  | Δ Da   | Exp.Mass             | Δ Da   |
| 1                 | 32 – 44                | 1360.784    | 1360.752  | -0.032 | 1360.789        | +0.005        | 1360.784  | 0.000  | n.d                  | n.d    |
| 2                 |                        |             | 1360.825  | +0.041 | 1360.776        | -0.008        | 1360.777  | -0.007 | 1360.931             | +0.147 |
| 1                 | 81 – 91                | 1178.606    | 1178.578  | -0.028 | 1178.612        | +0.006        | 1178.599  | -0.007 | n.d                  | n.d    |
| 2                 |                        |             | 1178.651  | +0.045 | 1178.602        | -0.004        | 1178.590  | -0.016 | 1178.722             | +0.116 |
| 1                 | 154 – 162              | 1112.541    | 1112.535  | -0.006 | 1112.555        | +0.014        | 1112.558  | +0.017 | n.d                  | n.d    |
| 2                 |                        |             | 1112.610  | +0.069 | 1112.548        | -0.007        | 1112.554  | +0.013 | 1112.666             | +0.125 |
| 1                 | 234 – 245 <sup>b</sup> | 1200.597    | 1200.600  | +0.003 | 1200.611        | +0.014        | 1200.626  | +0.029 | n.d                  | n.d    |
| 2                 |                        |             | 1200.664  | +0.067 | <b>1200.602</b> | <b>+0.005</b> | 1200.613  | +0.016 | 1200.731             | +0.134 |
| 1                 | 328 – 351              | 2395.354    | 2395.280  | -0.065 | 2395.327        | -0.018        | 2395.370  | +0.025 | n.d                  | n.d    |
| 2                 |                        |             | 2395.345  | 0.000  | 2395.250        | +0.005        | 2395.395  | +0.050 | 1395.637             | +0.292 |

nd, not detected

<sup>a</sup> Spot numbering is as used in fig. 3

<sup>b</sup> Peptide was also confirmed by Edman-sequencing.
